# Supplementary material
Source: HighWire-hosted journal article supplement (https://jnm.snmjournals.org/highwire/filestream/94290/field_highwire_adjunct_files/0/89581_Supplemental_Data.pdf)
Supplement: 89581_Supplemental_Data.pdf [file 89581_Supplemental_Data.pdf]

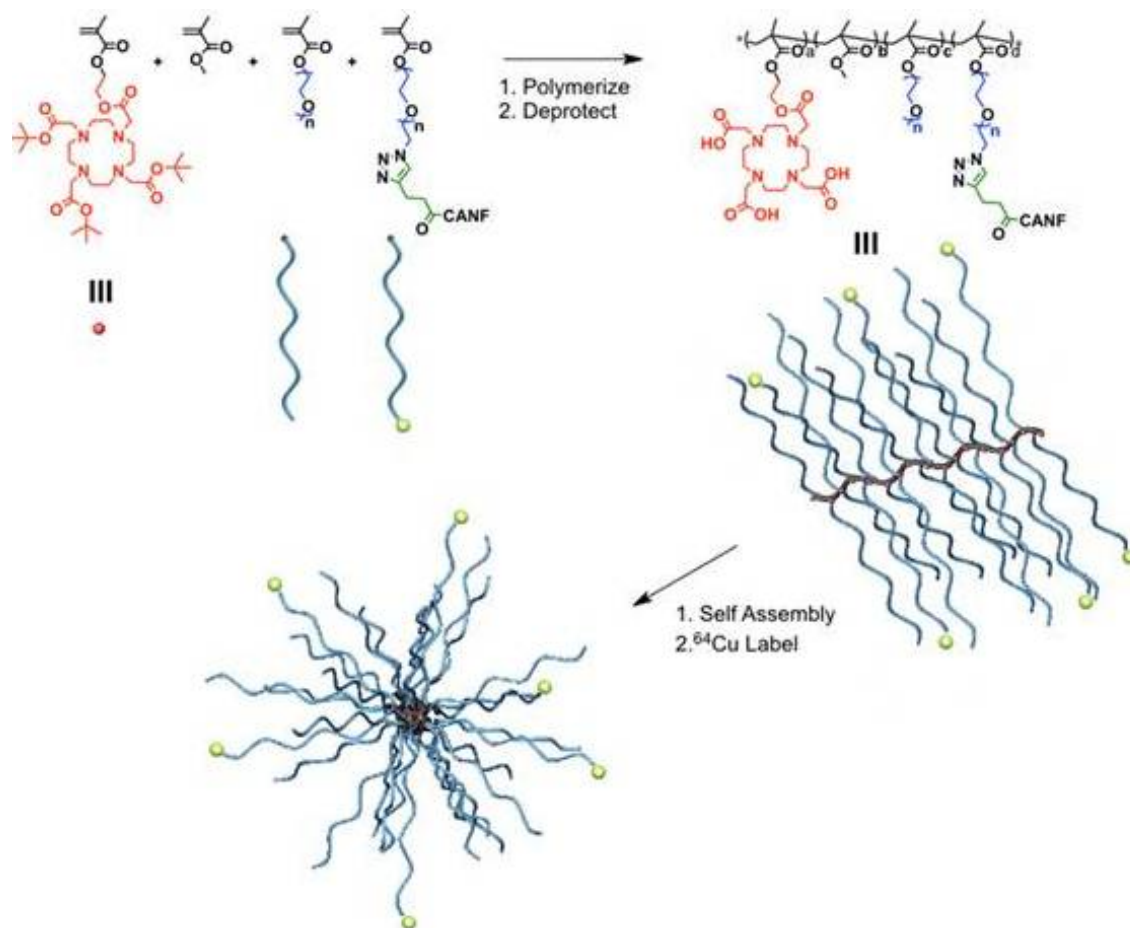

**SUPPLEMENTAL FIGURE 1.** Schematic representation of CANF-Comb nanoparticle synthesis and assembly.

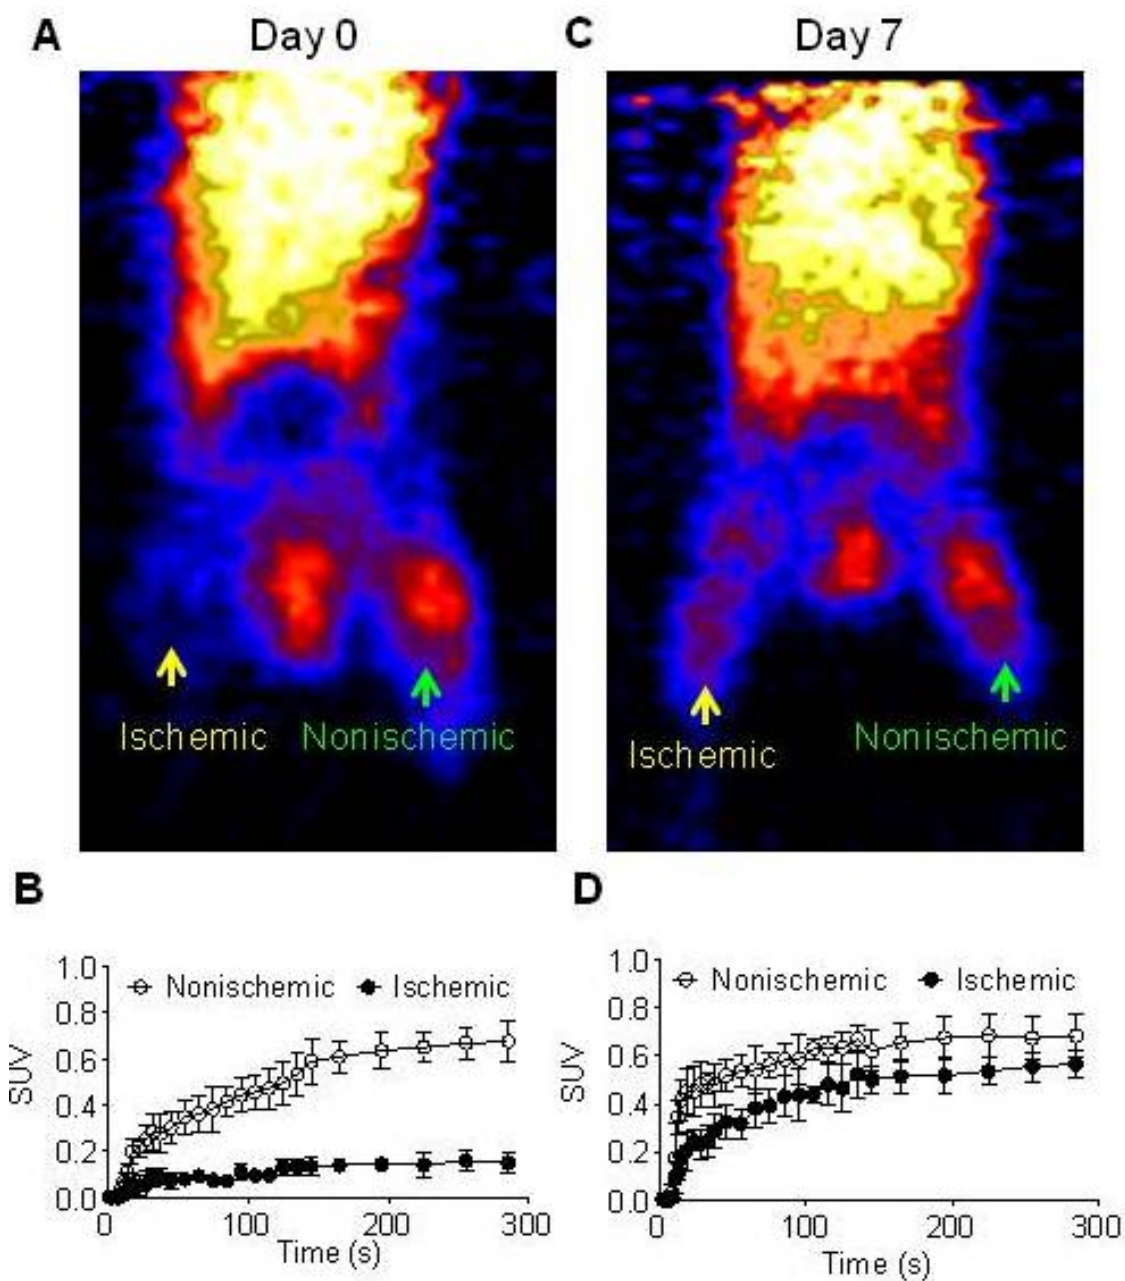

**SUPPLEMENTAL FIGURE 2.** [ $^{15}\text{O}$ ]  $\text{H}_2\text{O}$  dynamic imaging of blood flow in murine hindlimb

ischemia (HLI) induced angiogenesis model. (A) Coronal slice on day 0 showing the low blood flow indication of ischemia in right thigh of mouse. (B) Quantitative standard uptake value (SUV,  $n=4$ ) of ischemic and nonischemic limbs on day 0. (C) Coronal slice on day 7 showing the recovery of blood flow in the right thigh of mouse shown in A. (D) SUV ( $n=4$ ) of ischemic and nonischemic lesions on day 7.

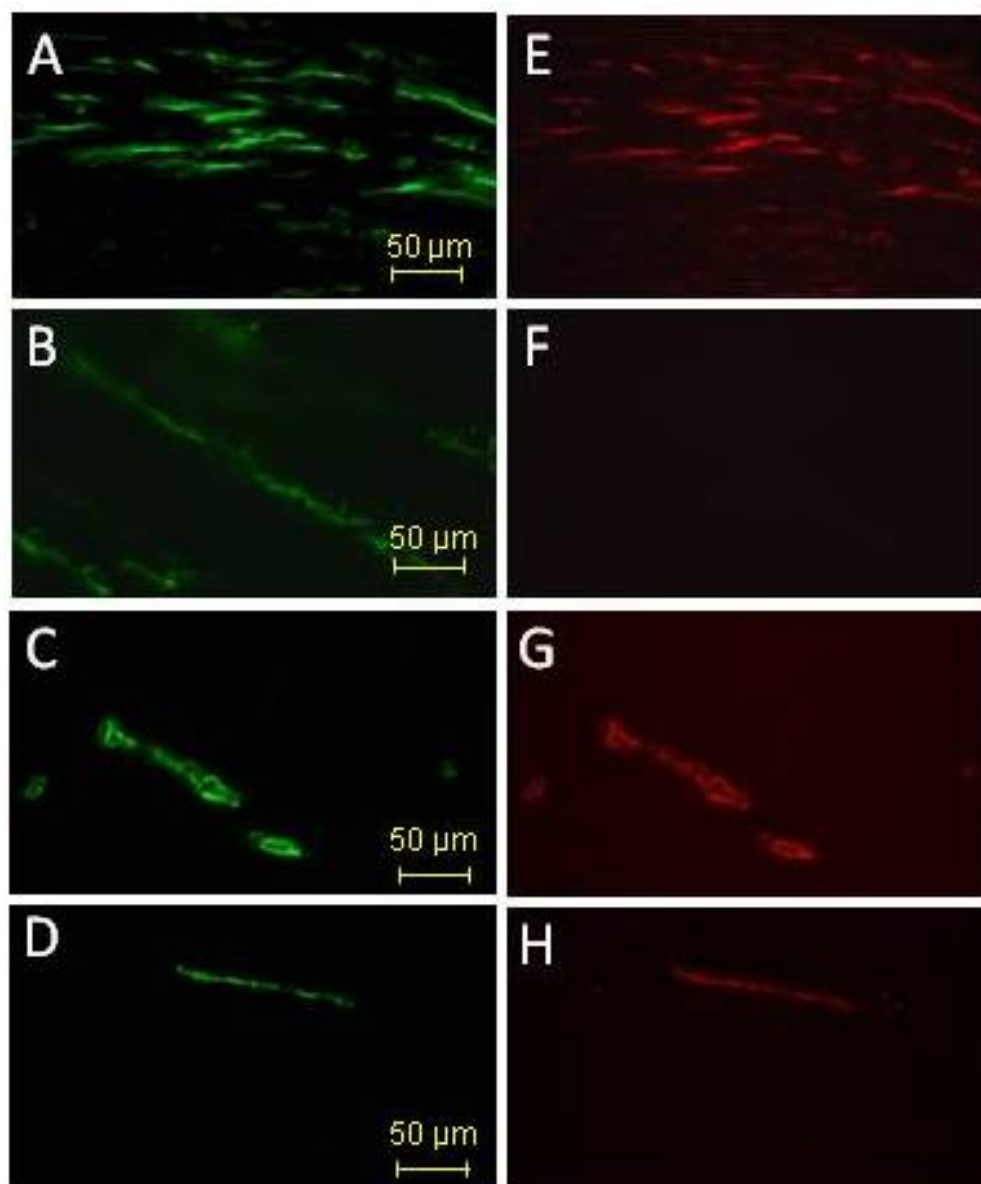

**SUPPLEMENTAL FIGURE 3.** Immunofluorescent staining for PECAM-1 in endothelial cells (*A, B*) or  $\alpha$ -actin in capillary smooth muscle cells (*C, D*) (green). Immunofluorescent staining for NPR-C (red) in endothelial cells (*E, F*) and smooth muscle cells (*G, H*).

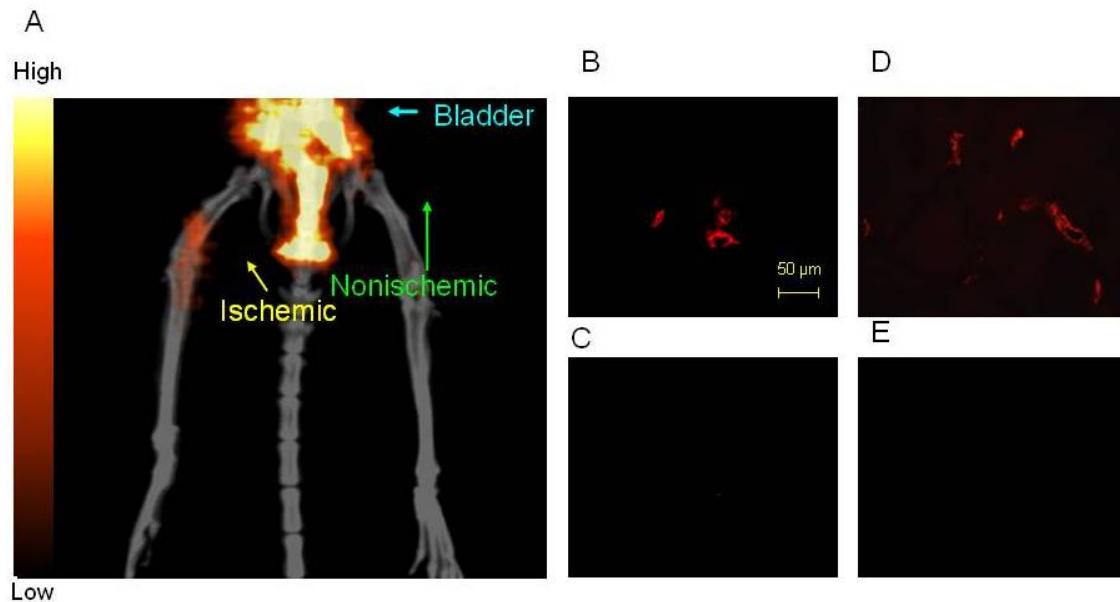

**SUPPLEMENTAL FIGURE 4.** Competitive PET and immunofluorescent receptor blocking. (A)

$^{64}\text{Cu}$ -DOTA-CANF-comb in HLI mice with co-administration of unlabeled DOTA-CANF-comb

showing the significantly reduced accumulation at ischemic limb. (B) Fluorescent images of ischemic

thigh muscle stained with NPR-C on endothelia. (C) Immunofluorescent staining for NPR-C after

competitive blocking of antibody-antigen binding showed receptor specific binding. (D) Fluorescent

images of ischemic thigh muscle stained with NPR-C on smooth muscle cells. (E) Immunofluorescent

staining for NPR-C after competitive blocking of antibody-antigen binding showed receptor specific

binding. Line shows 50 μm.
